# Supplementary material
Source: PubMed Central journal article supplement (PMC4761227)

Figures for Supporting Information

**Figure S3.** MRM spectral evidences for the 10 validated peptides corresponding to the 8 missing proteins (1-8). Reference indicates spectrum from synthetic peptide while others corresponds to MRM spectra from Hp-RP fractionated NSCLC cell lines membrane samples. The MRM mass spectra for additional three missing proteins (i-iii) not further validated are also shown.

1) Missing Protein: TEX261

Peptide sequence: LGILVVFSFIK

Hp-RP fraction: F5

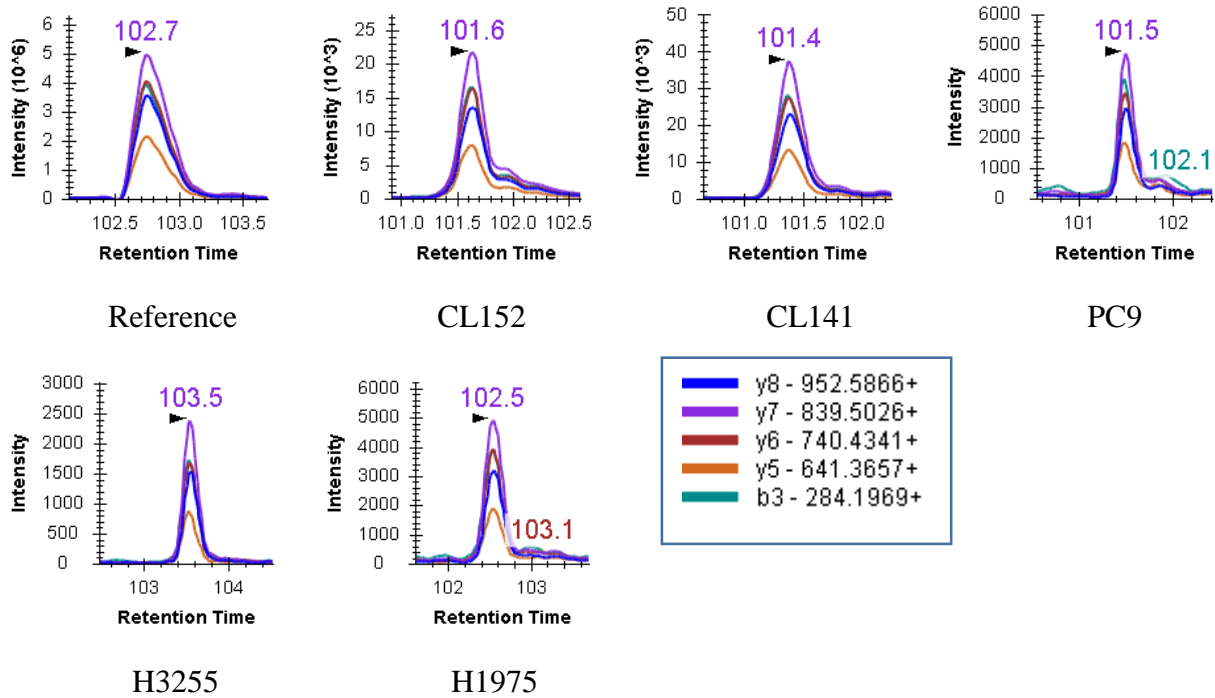

2) Missing Protein: TMEM14B

Peptide sequence: TGSVPSLAAGLLFGSLAGLGAYQLYQDPR

Hp-RP fraction: F5

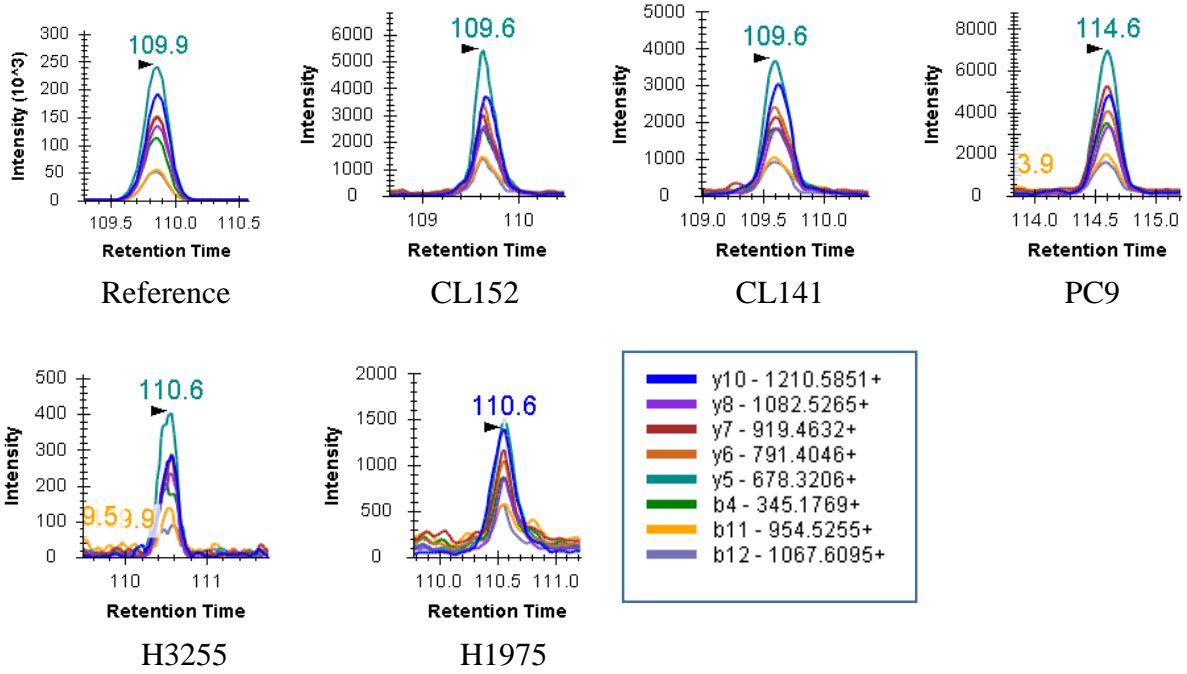

3) Missing Protein: GPR110  
 Peptide sequence 1: VLIGSDQFQR  
 Hp-RP fraction: F4

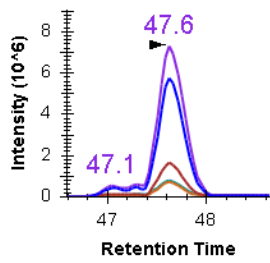

Reference

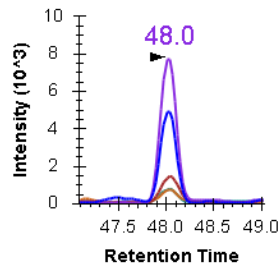

H3255

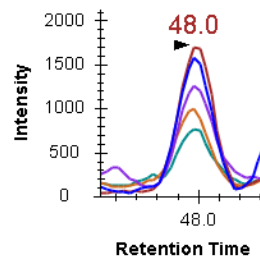

CL152

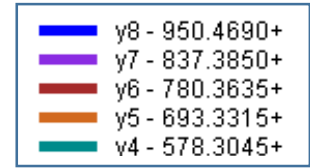

Peptide sequence 2: IQGFESVQVTQFR  
 Hp-RP fraction: F4

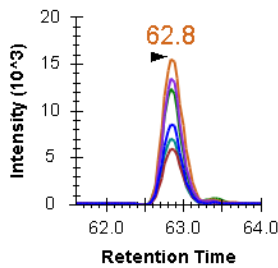

Reference

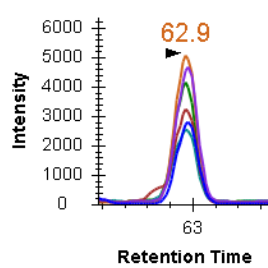

H3255

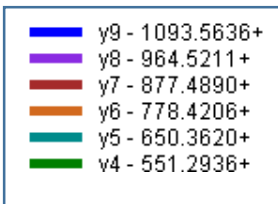

4) Missing Protein: PCDBH6  
 Peptide sequence 1: SLDYEALQSFEFR  
 Hp-RP Fraction: F4

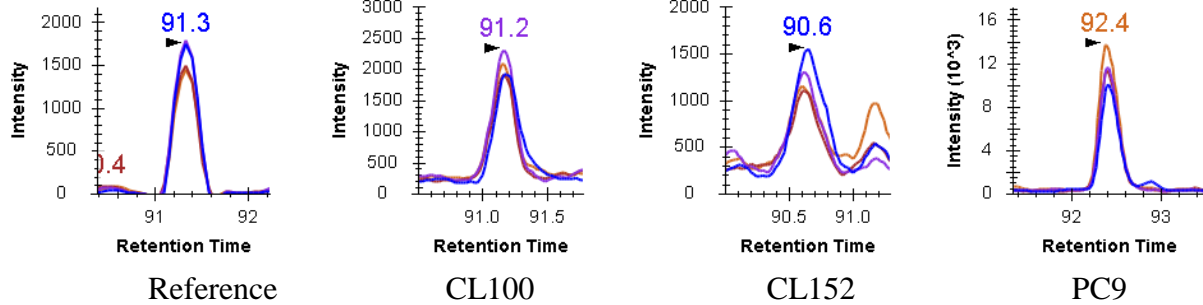

Peptide sequence 2: YTISSNPHFHVLTR  
 Hp-RP fraction: F4

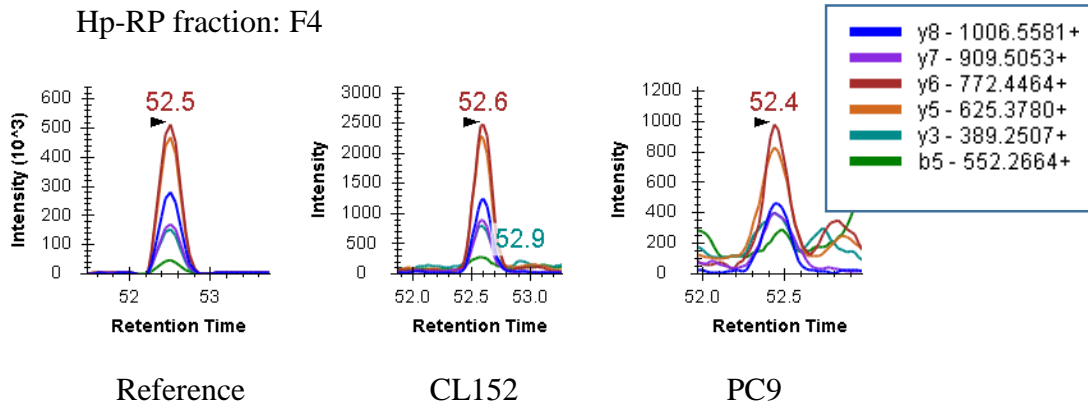

5) Missing TTC16  
 Peptide sequence: LQEFDGAVEDFLK  
 Hp-RP fraction: F1

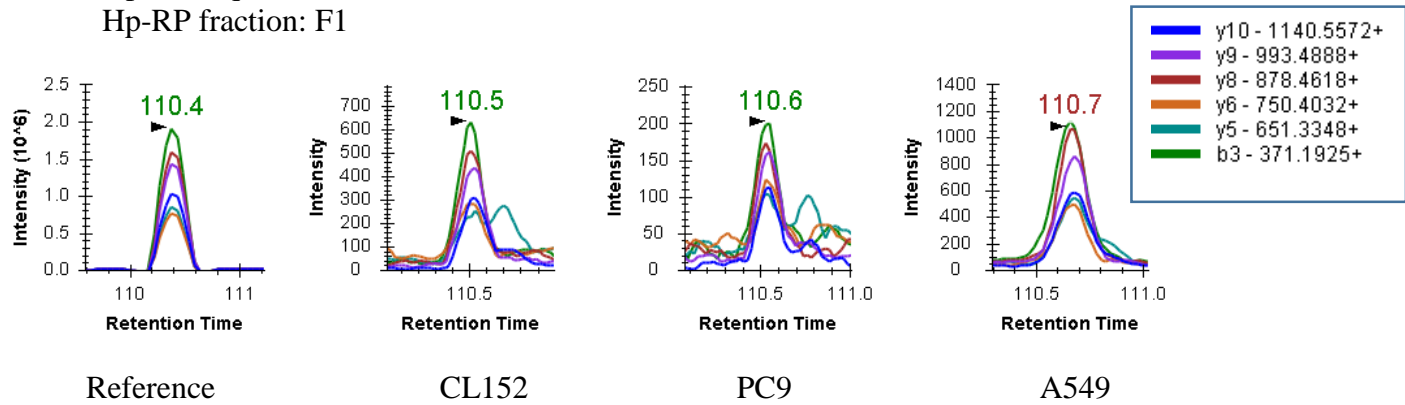

6) Missing Protein: SLC10A3  
 Peptide sequence: VTSLDTEVLTIK  
 Hp-RP fractions: F3

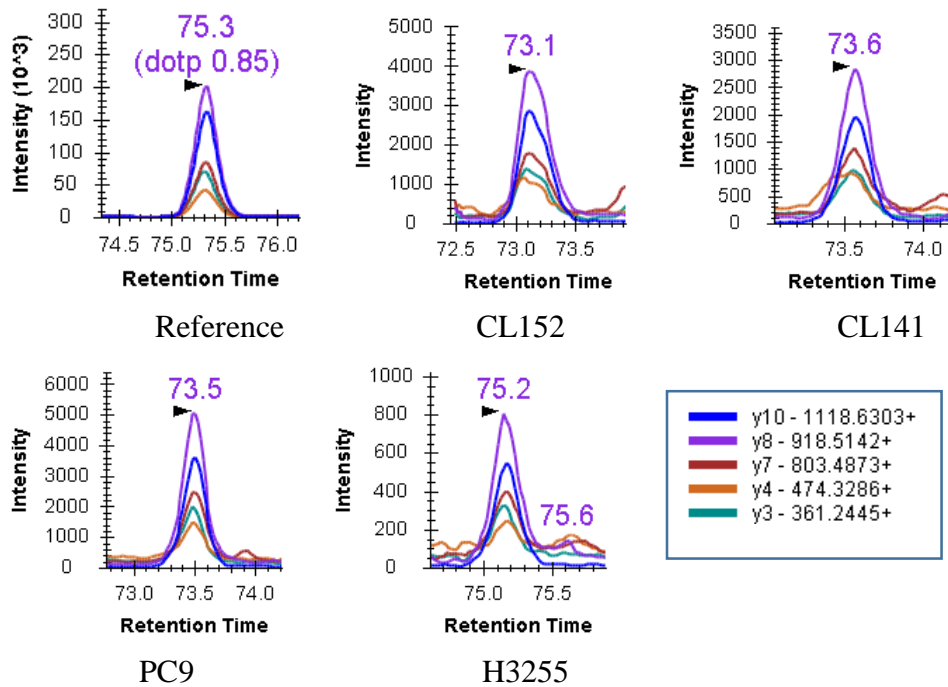

7) Missing Protein: ST7L  
 Peptide sequence: GLSTAEINAVEAIHR  
 Hp-RP fraction: F2

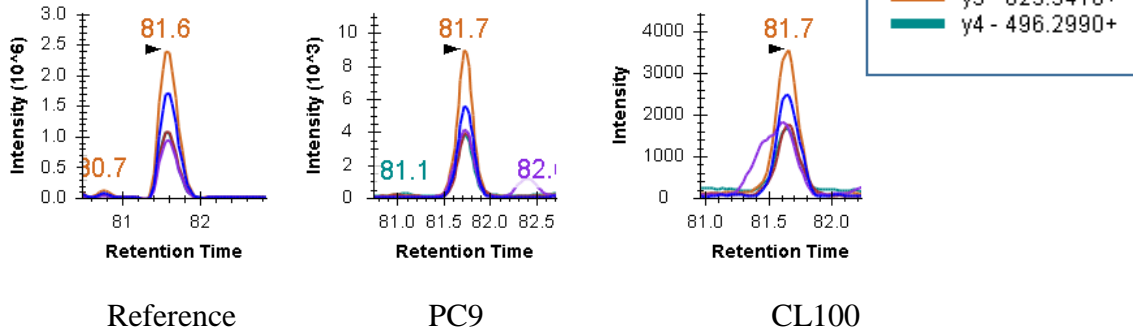

8) Missing Protein: GCNT2  
 Peptide sequence: YVHQELLNHK  
 Hp-RP fraction: F2

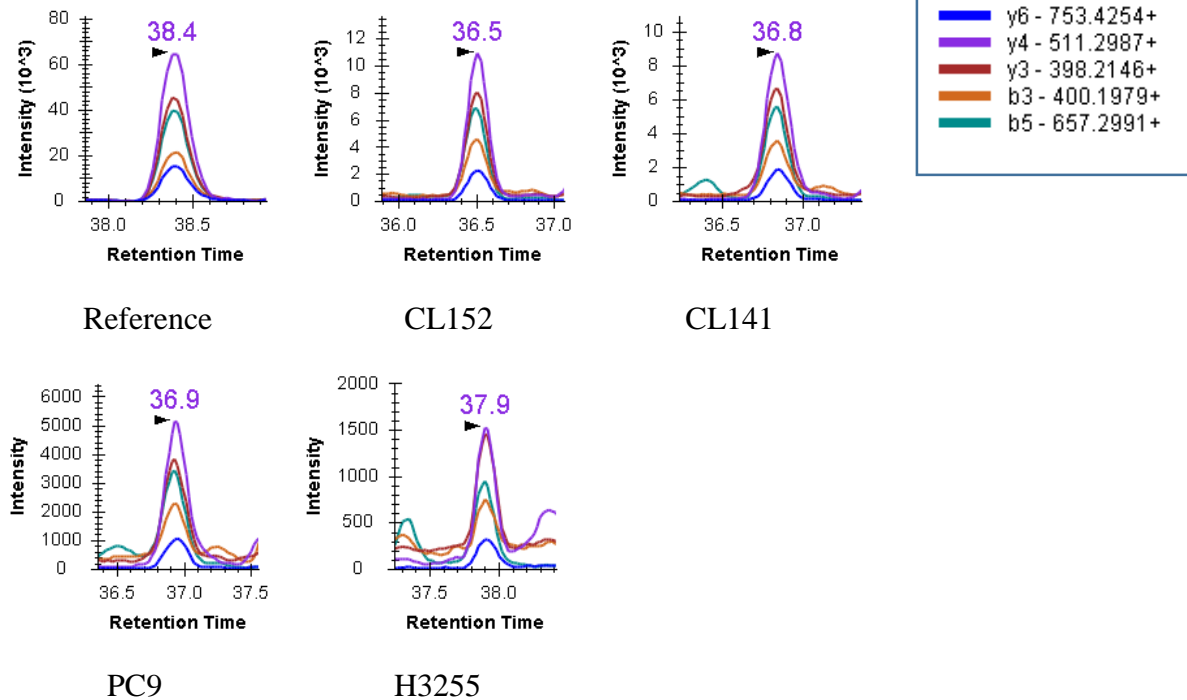

## Missing Proteins not validated by MRM

- i. BPIFB3: SVAGDIIDFPK
- ii. TM4SF20: ASSFHFDSEENK
- iii. C19orf29OS: VHAVEEAR and LAEAIVAVR

- i) Missing Protein: BPIFB3  
Peptide sequence: SVAGDIIDFPK  
Hp-RP fraction: F1

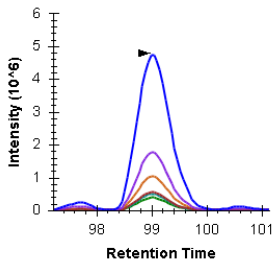

Reference

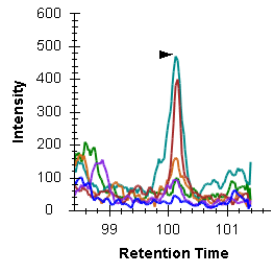

CL152

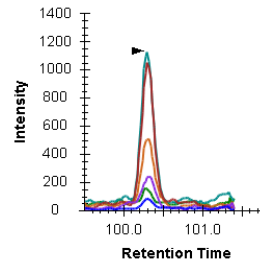

PC9

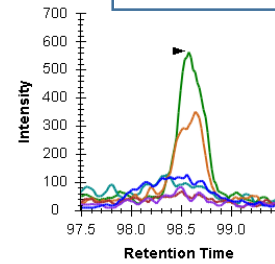

A549

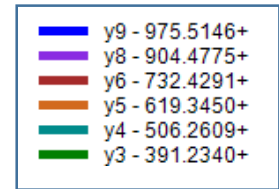

- ii) Missing Protein: TM4SF20  
Peptide sequence: ASSFHFDSEENK  
Hp-RP fraction: F1

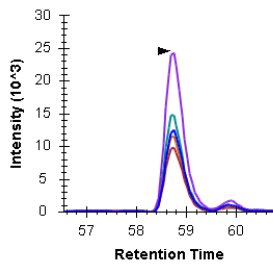

Reference

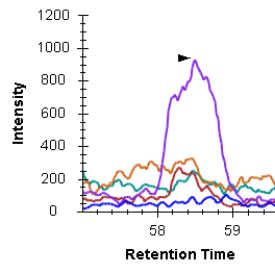

CL152

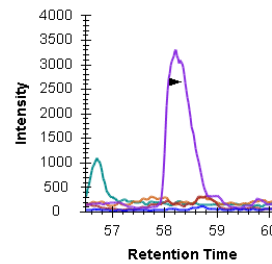

PC9

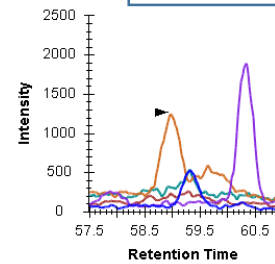

A549

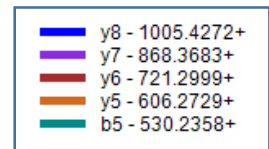

iii) Missing Protein: C19orf29OS  
 Peptide sequence 1: VHAVEEAR  
 Hp-RP fraction: F1

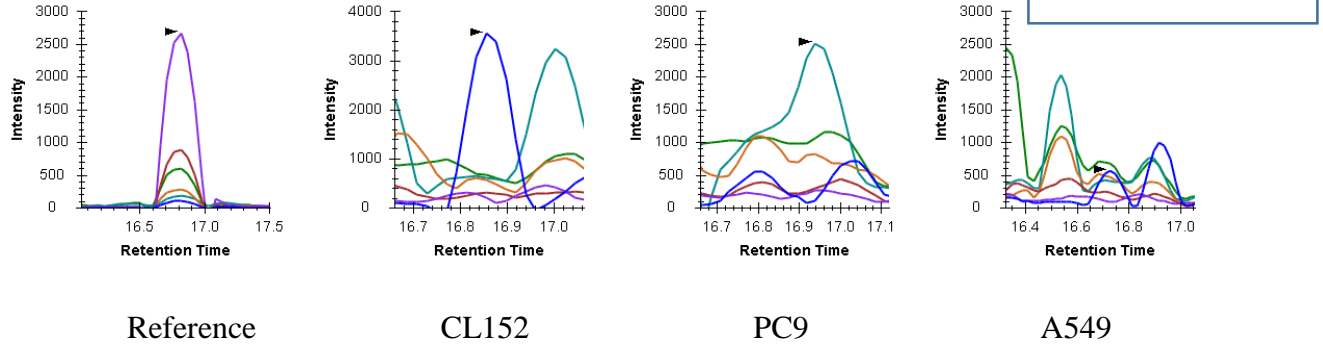

Peptide sequence 2: LAAEAVAVR  
 Hp-RP fraction: F3

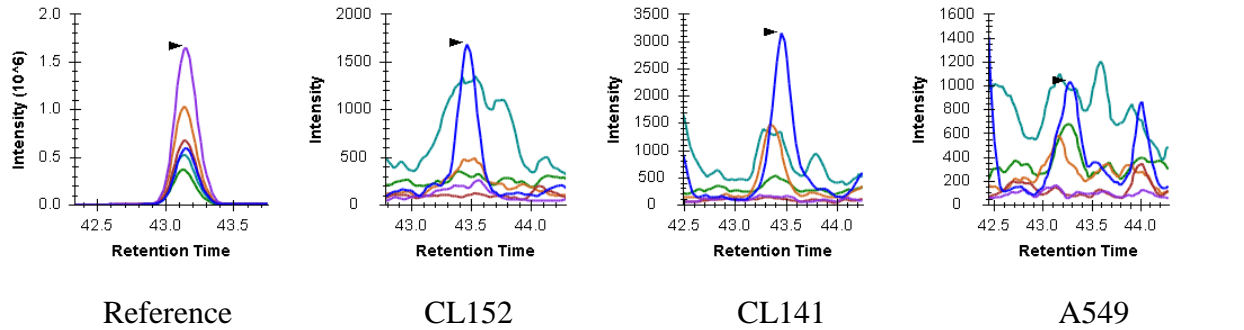

Supplement: NIHMS757259-supplement-Supplementary_Figure_3.pdf [file NIHMS757259-supplement-Supplementary_Figure_3.pdf]
