# Supplementary material
Source: PubMed Central journal article supplement (PMC4761227)
Supplement: NIHMS757259-supplement-Supplementary_Figure_1.pdf [file NIHMS757259-supplement-Supplementary_Figure_1.pdf]

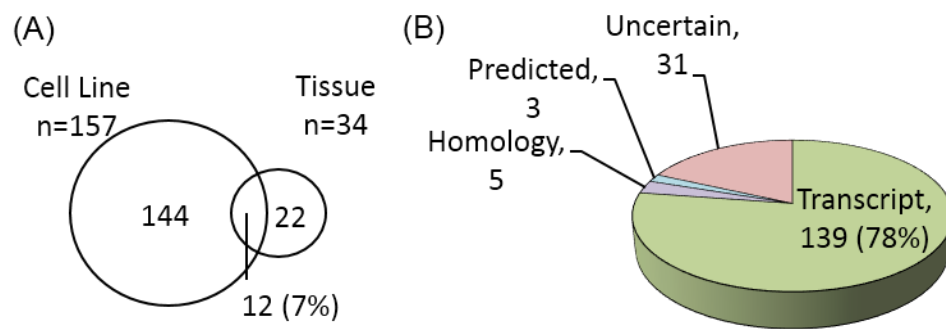

**Figure S1.** Missing protein identification. (A) Comparison of missing proteins identified between the lung cancer cell line and lung tissue samples (with PSM-, peptide-, and protein-level FDR of 1%). From the overall 178 missing proteins, 12 proteins were found common in the two types of biological specimens. (B) 77% of the missing proteins have transcript-level evidence
