# Supplementary material
Source: PubMed Central journal article supplement (PMC4761227)
Supplement: NIHMS757259-supplement-Supplementary_Figure_2.pdf [file NIHMS757259-supplement-Supplementary_Figure_2.pdf]

(A)

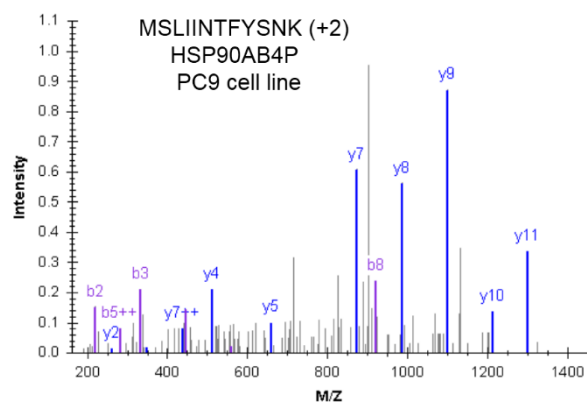

(B)

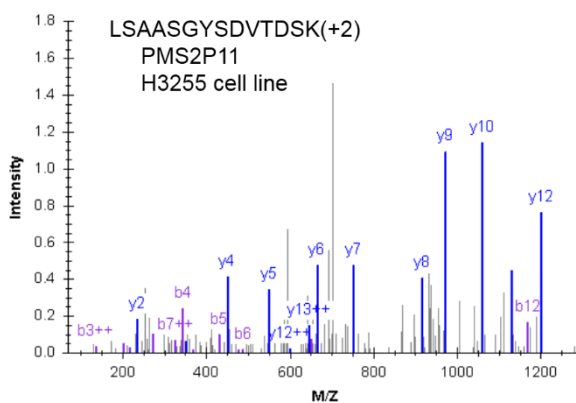

(C)

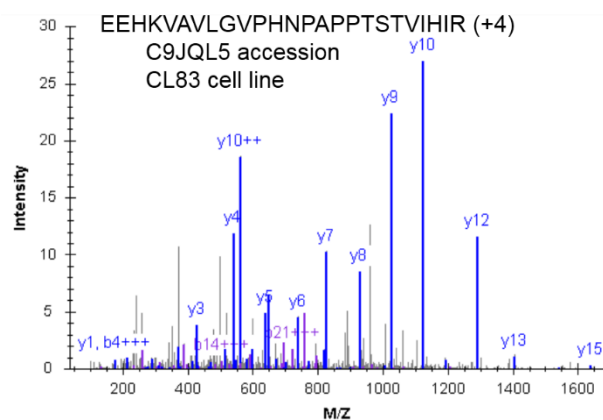

(D)

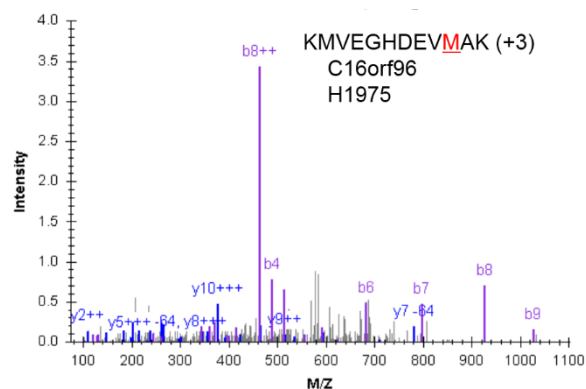

(E)

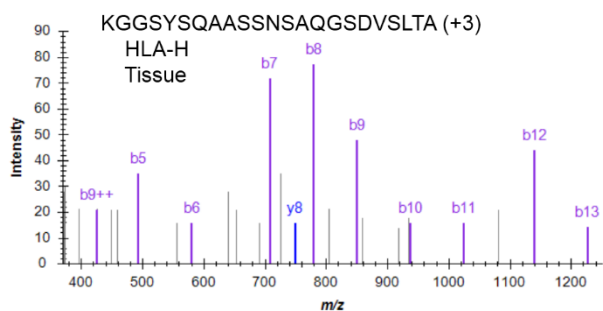

(F)

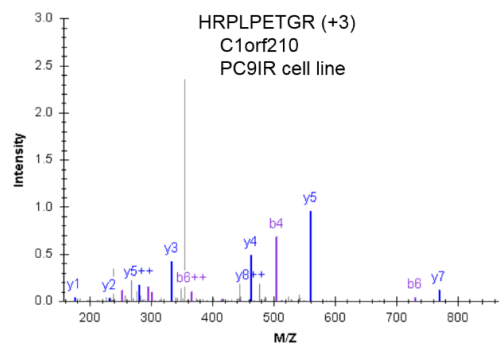

(G)

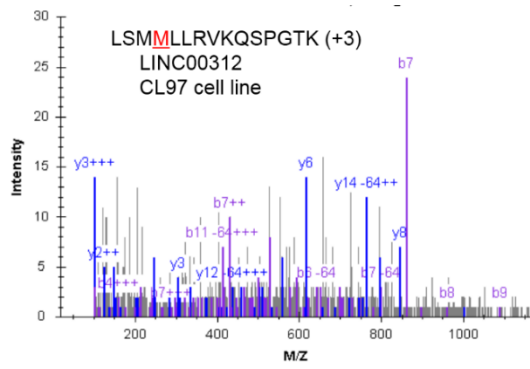

(H)

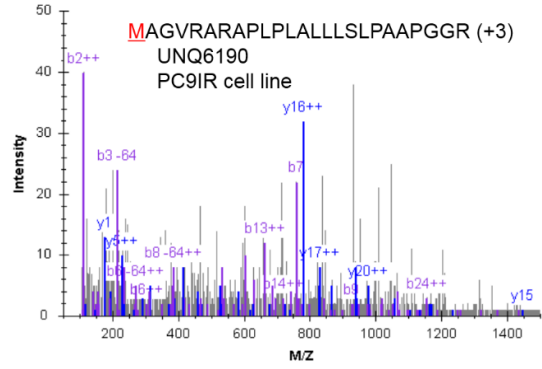

(I)

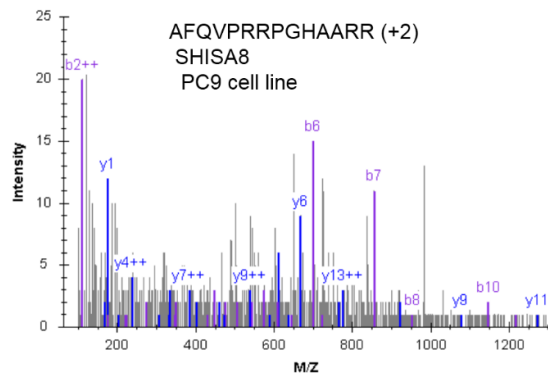

(J)

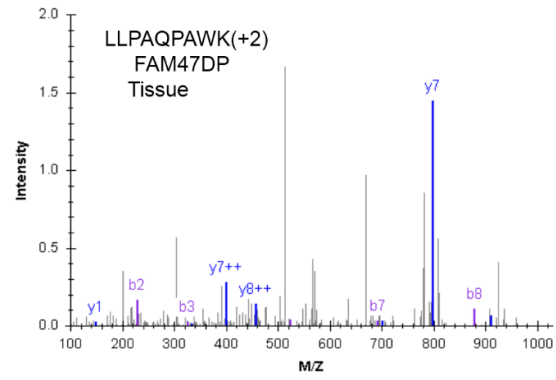

Figure S2. Sample DDA spectra of PE5 proteins with single hit spectrum. (A) HSP90AB4P, (B) PMS2P11, (C) C9JQL5 (no given name), (D) C16orf96, (E) HLA-H, (F) C1orf210, (G) LINC00312, (H) UNQ6190, (I) SHISA8, and (J) FAM47DP.
