# Supplementary material
Source: PubMed Central journal article supplement (PMC4761227)
Supplement: NIHMS757259-supplement-Supplementary_Figure_4.pdf [file NIHMS757259-supplement-Supplementary_Figure_4.pdf]

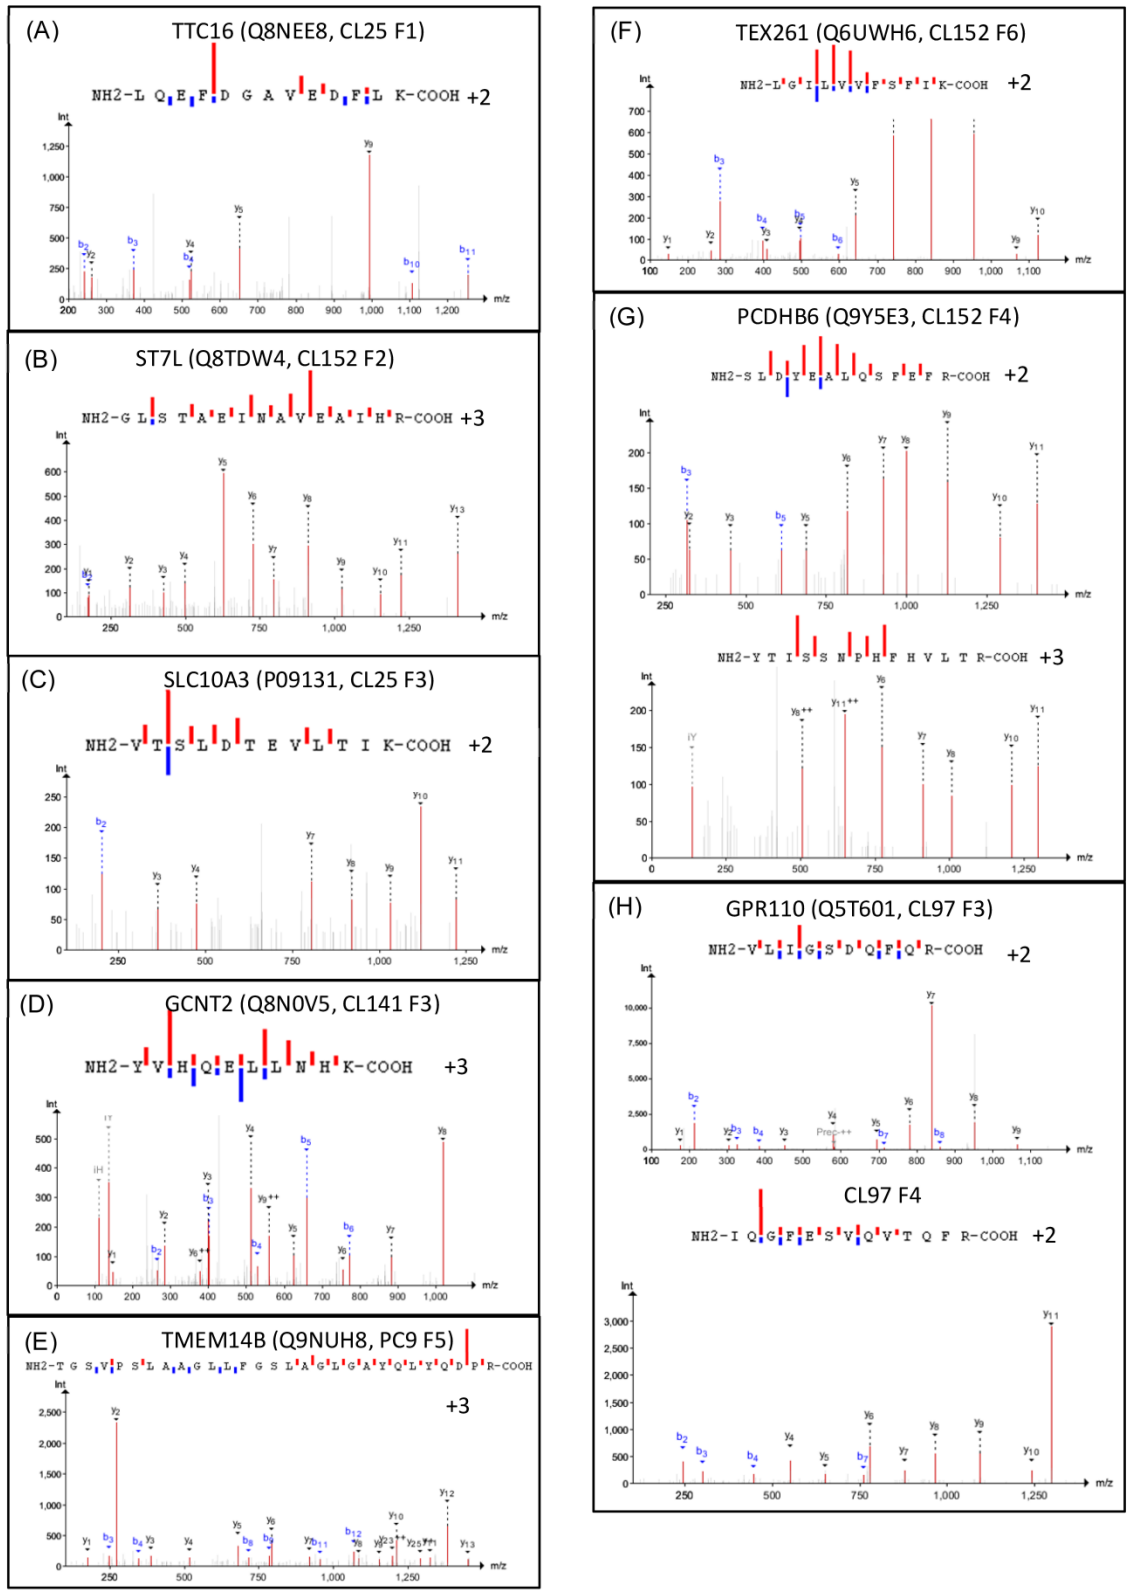

Figure S4. Sample DDA spectra of 8 validated missing proteins. (A) TTC16, (B) ST7L, (C) SLC10A3, (D) GCNT2, (E) TMEM14B, (F) TEX261, (G) PCDHB6, (H) GPR110
