# Supplementary material
Source: PubMed Central journal article supplement (PMC4761227)
Supplement: NIHMS757259-supplement-Supplementary_Figure_5.pdf [file NIHMS757259-supplement-Supplementary_Figure_5.pdf]

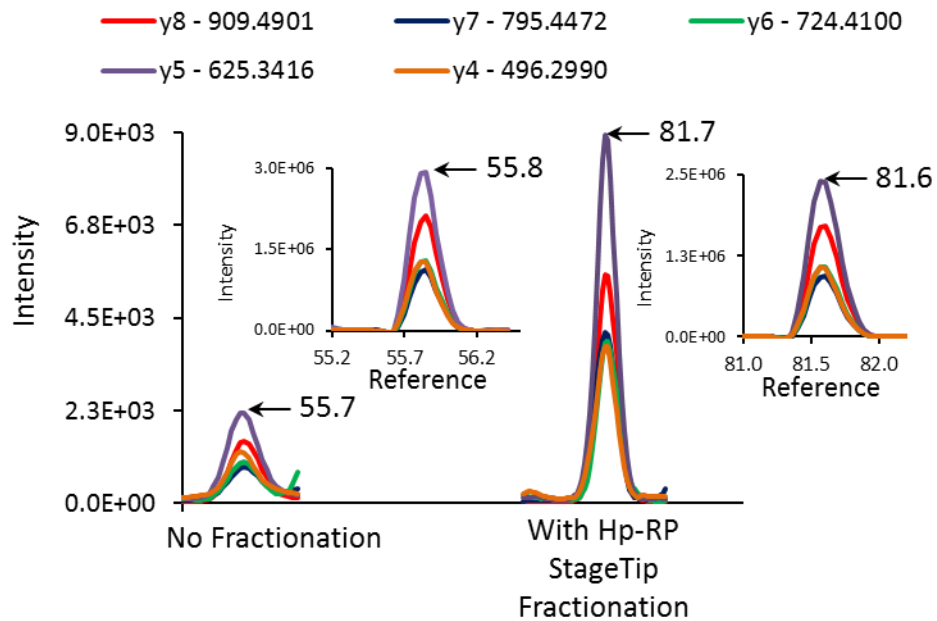

**Figure S5.** Comparison of validation results between Hp-RP StageTip fractionated peptides and peptides without fractionation. A significant increase in the peak intensities were observed for fractionated peptides prior to MRM analysis. Sample MRM peaks are from ST7L (GLSTAEINAVEAIHR).
